# Supplementary material for: Fungal Light-Oxygen-Voltage Domains for Optogenetic Control of Gene Expression and Flocculation in Yeast
Source: PubMed Central journal article supplement (PMC6069114; doi:10.1128/mbio.00626-18), 2018-07-31

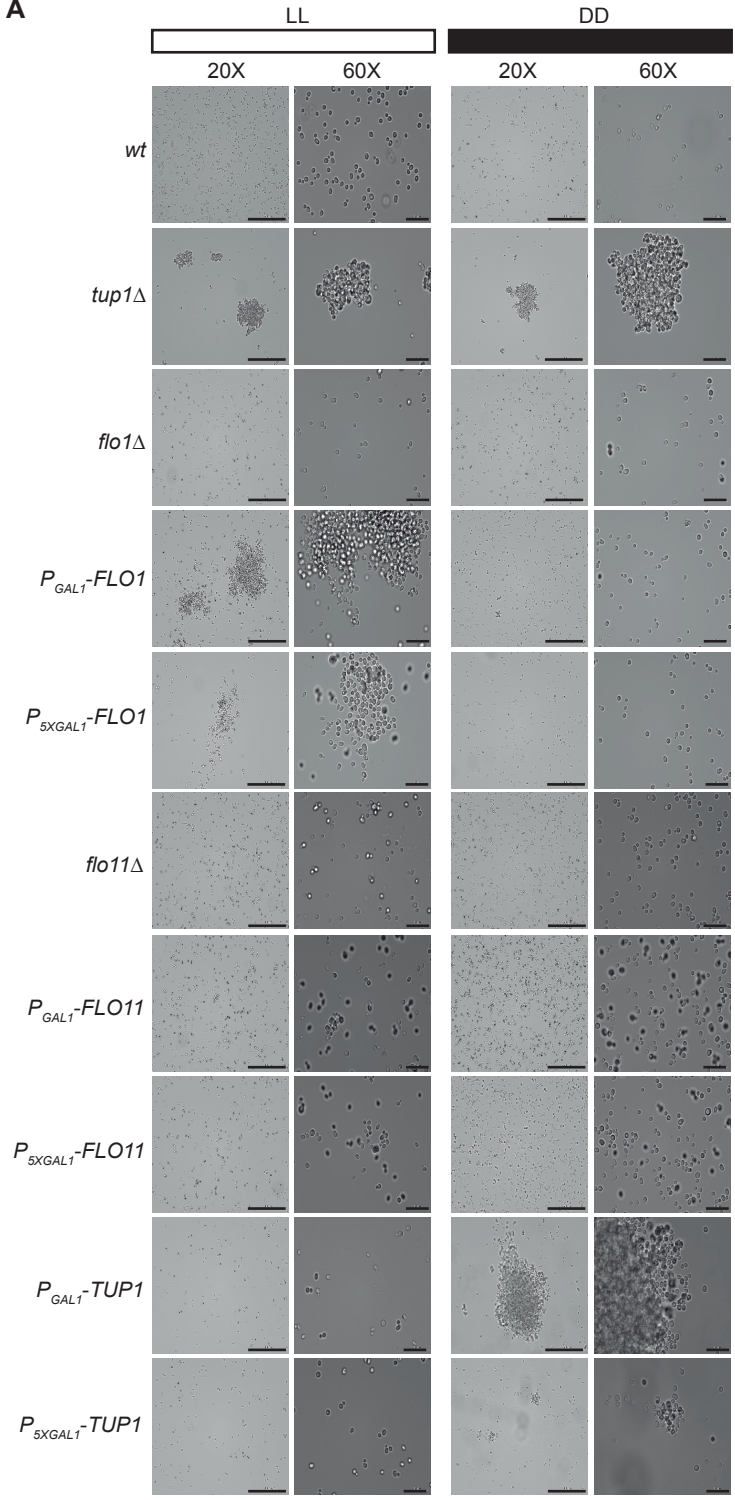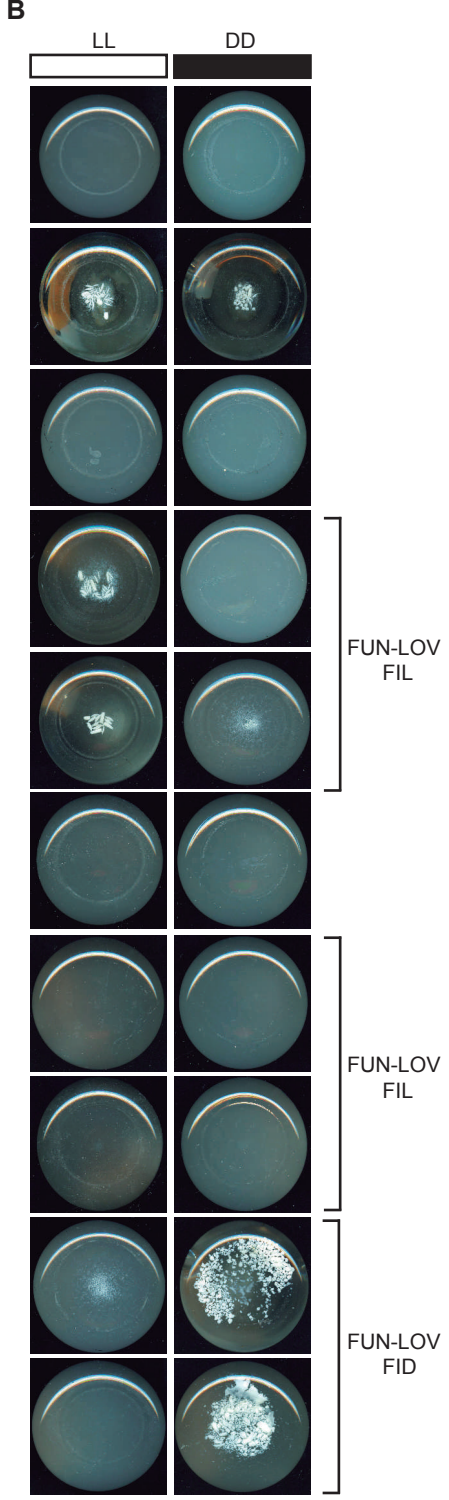

Supplement: mbo004183986sf7.pdf [file mbo004183986sf7.pdf]
