# Supplementary material for: Fungal Light-Oxygen-Voltage Domains for Optogenetic Control of Gene Expression and Flocculation in Yeast
Source: PubMed Central journal article supplement (PMC6069114; doi:10.1128/mbio.00626-18), 2018-07-31
Supplement: mbo004183986st1.pdf [file mbo004183986st1.pdf]

**Table S1. Primers used in this work**

**For plasmids assembly utilizing yeast recombinational cloning.**

| Name   | Sequence (5'-3')                                       | Length (bp) |    | Description                                       |
|--------|--------------------------------------------------------|-------------|----|---------------------------------------------------|
| 13     | AGCGGATAACAATTTACACAGGAA<br>ACAGCTAGGCGCATGCAACTTCTTT  | 50          | FW | <i>YRP-L-P<sub>ADH1</sub></i>                     |
| oL3148 | GGTAACGCCAGGGTTTTCCCAGTCA<br>CGACGCCGGTAGAGGTGTGGTCAAT | 50          | RV | <i>ADH2<sub>ter</sub>-YRP-R</i>                   |
| 19     | AGCGGATAACAATTTACACAGGAA<br>ACAGCATCGATGAATTCGAGCTCGT  | 50          | FW | <i>YRP-L-KanMxRV</i>                              |
| 20     | CGGGTTAATTAAGGCGCGCC                                   | 20          | RV | <i>KanMxRV</i>                                    |
| 21     | AAACAGATCTGGCGCGCCTTAATTA<br>ACCCGACTAGTACGGATTAGAAGCC | 50          | FW | <i>KanMxRV-P<sub>GAL1</sub></i>                   |
| oL3026 | aaacagatctggcgcgccttaatta<br>accgcggaggacagtactccgctc  | 50          | FW | <i>KanMxRV-P<sub>5XGAL1</sub></i>                 |
| oL3080 | GCCCTTCTTAATGTTCTTAGCATCG<br>GCCATGGTAAGCTTAATATCCCTA  | 50          | RV | <i>Luc-P<sub>GAL1</sub></i>                       |
| oL3079 | CGACTCACTATAGGGAATTAAGC<br>TTACCATGGCCGATGCTAAGAACAT   | 50          | FW | <i>P<sub>GAL1</sub>-Luc</i>                       |
| oL3081 | GGTAACGCCAGGGTTTTCCCAGTCA<br>CGACGTGGATCCTTGCAAATTAAG  | 50          | RV | <i>CYC1<sub>ter</sub>-YRP-R</i>                   |
| 22     | GGTAACGCCAGGGTTTTCCCAGTCA<br>CGACGGGTAAGCTTAATATCCCTA  | 50          | RV | <i>P<sub>GAL1</sub>(P<sub>5XGAL1</sub>)-YRP-R</i> |
| oL3150 | AGCGGATAACAATTTACACAGGAA<br>ACAGCATTTCAAAGAATACGTAAT   | 50          | FW | <i>YRP-L-P<sub>TDH3</sub></i>                     |
| oL3151 | CATGTTATCCTCCTCGCCCTTGCTC<br>ACCATTTTGTGTTTATGTGTGTT   | 50          | RV | <i>mCherry-P<sub>TDH3</sub></i>                   |
| oL3152 | GTTTCGAATAAACACACATAAAACA<br>ACAAAATGGTGAGCAAGGGCGAGGA | 50          | FW | <i>P<sub>TDH3</sub>-mCherry</i>                   |
| oL3153 | GAATGTAAGCGTGACATAACTAATT<br>ACATGCTACTTGTACAGCTCGTCCA | 50          | RV | <i>CYC1<sub>ter</sub>-mCherry</i>                 |
| oL3154 | ACCGGCGGCATGGACGAGCTGTACA<br>AGTAGCATGTAATTAGTTATGTCAC | 50          | FW | <i>mCherry-CYC1<sub>ter</sub></i>                 |
| oL3266 | TTTTGGGACGCTCGAAGGCTTTTAA<br>TTTGcgggtaattaaggcgcgcc   | 50          | FW | <i>CYC1<sub>ter</sub>-HphMx</i>                   |
| oL3267 | aaacagatctggcgcgccttaatta<br>accgcGCAAATTAAGCCTTCGAG   | 50          | RV | <i>HphMx-CYC1<sub>ter</sub></i>                   |
| oL2562 | gGTAACGCCAGGGTTTTCCCAGTCA<br>CGACGatcgatgaattcgagctcgt | 50          | RV | <i>HphMx-YRP-R</i>                                |

**Primers used for promoter swapping**

| Name   | Sequence (5'-3')                                                               | Length (bp) |    | Description                                                             |
|--------|--------------------------------------------------------------------------------|-------------|----|-------------------------------------------------------------------------|
| oL3024 | ctcttttcctaataaggtggagct<br>tttggctccagtatgctttcacgg<br>atcgatgaattcgagctcgt   | 70          | FW | <i>P<sub>FLO1Δ</sub>::KanMxRV-P<sub>GAL1</sub>(P<sub>5XGAL1</sub>)</i>  |
| oL3025 | gccagaagtgtaaagactgcaaaa<br>acatatagcgatgaggcattgtcat<br>ggtaagcctaataattcccta | 70          | RV | <i>P<sub>FLO1Δ</sub>::KanMxRV-P<sub>GAL1</sub>(P<sub>5XGAL1</sub>)</i>  |
| oL3055 | ATTCTCATCGAGAGCCGAGCCATAC<br>ACCTAAGGTGGACAGAAAGCTAAAA<br>ATCGATGAATTCGAGCTCGT | 70          | FW | <i>P<sub>FLO11Δ</sub>::KanMxRV-P<sub>GAL1</sub>(P<sub>5XGAL1</sub>)</i> |
| oL3056 | TAAATAGAAGCGAAAGGACCAAT<br>AAGCGAGTAGAAATGGTCTTTGCAT                           | 70          | RV | <i>P<sub>FLO11Δ</sub>::KanMxRV-P<sub>GAL1</sub>(P<sub>5XGAL1</sub>)</i> |

|        |                                                                                |    |    |                                                      |
|--------|--------------------------------------------------------------------------------|----|----|------------------------------------------------------|
|        | GGTAAGCTTAATATTCCCTA                                                           |    |    |                                                      |
| oL3233 | CTTCACTCTTGACGCCAGTTGAGTG<br>AGGGACTGAATACTATATACAGTAA<br>ATCGATGAATTCGAGCTCGT | 70 | FW | $P_{TUP1\Delta}::KanMxRV-$<br>$P_{GAL1}(P_{5XGAL1})$ |
| oL3261 | TCGAGAAGCTCATTGAGCTTATTCT<br>GCGTATTCGAAACGCTGGCAGTCATgg<br>taagcttaatattcccta | 70 | RV | $P_{TUP1\Delta}::KanMxRV-$<br>$P_{GAL1}(P_{5XGAL1})$ |

#### Primers used promoter-swapping confirmations.

| Name   | Sequence (5'-3')                                       | Length (bp) |    | Description                |
|--------|--------------------------------------------------------|-------------|----|----------------------------|
| oL2789 | ttggaacgatgaggaacc                                     | 20          | FW | Upstream<br><i>FLO1</i>    |
| oL3050 | ACTTTTCCTCTGGCCTGCTG                                   | 20          | RV | Internal <i>FLO1</i>       |
| oL3163 | TACCGTCGTTTTGGGGTTCC                                   | 20          | FW | Upstream<br><i>FLO11</i>   |
| oL3071 | TTGGGACAGCCATTAACGAT                                   | 20          | RV | Internal<br><i>FLO11</i>   |
| oL3262 | GCGGAATCGATCTGTTGTTT                                   | 20          | FW | Upstream<br><i>TUP1</i>    |
| oL3263 | CTTCTTCGTACGCGTCCTTC                                   | 20          | RV | Internal <i>TUP1</i>       |
| 21     | AAACAGATCTGGCGCGCCTTAATTA<br>ACCCGACTAGTACGGATTAGAAGCC | 50          | FW | $KanMxRV-$<br>$P_{GAL1}$   |
| oL3026 | aaacagatctggcgcgcctaatta<br>accgcggaggacagtactccgctc   | 50          | FW | $KanMxRV-$<br>$P_{5XGAL1}$ |
| oL2091 | CATCCTATGGAAGTGCCTCGG                                  | 21          | FW | Internal<br><i>KanMx</i>   |

#### Primers used for gene deletion and reporter gene integration in the genome.

| Name   | Sequence (5'-3')                                                                  | Length (bp) |    | Description          |
|--------|-----------------------------------------------------------------------------------|-------------|----|----------------------|
| oL2787 | Ctcttttctaataaggtggagct<br>ttggctccagatgcttcacgg<br>cggcatcagagcagattgtactg       | 73          | FW | <i>flo1Δ::URA3</i>   |
| oL2806 | Tactcgaaaacatcctaagcgaacc<br>acactagatcttagcttagtactgc<br>ggtatttcacaccgcataggg   | 71          | RV | <i>flo1Δ::URA3</i>   |
| oL3072 | TGCGGTATCTTCACGGACAGAACTT<br>CTATTGCCTATCGGTGGTGTGATTA<br>cggcatcagagcagattgtactg | 73          | FW | <i>flo11Δ::URA3</i>  |
| oL3073 | CGAAGATTATTAGTTGTGCCAAGGC<br>AATATCAGGTTTATTAATCTTTTAG<br>ggtatttcacaccgcataggg   | 71          | RV | <i>flo11Δ::URA3</i>  |
| oL2120 | CCAGCGTATACAATCTCGATAGTTG<br>GTTCCCGTTCTTTCCACTCCCCTC<br>CGGGTTAATTAAGGCGCGCC     | 70          | FW | <i>gal80Δ::HphMx</i> |
| oL2121 | GTTTTTATAACGTTTCGCTGCACTGG<br>GGGCAAGCACAGGGCAAGATGCTT<br>ATCGATGAATTCGAGCTCGT    | 70          | RV | <i>gal80Δ::HphMx</i> |
| oL2122 | ATGCACAGTTGAAGTGAAGTTGCGG<br>GGTTTTTCAGTATCTACGATTGATT<br>CGGGTTAATTAAGGCGCGCC    | 70          | FW | <i>gal4Δ::NatMx</i>  |
| oL2123 | AATGCACGCCATCATTTTAAGAGAG<br>GACAGAGAAGCAAGCCTCCTGAAAG                            | 70          | RV | <i>gal4Δ::NatMx</i>  |

|        |                                                                                                        |    |    |                                                                     |
|--------|--------------------------------------------------------------------------------------------------------|----|----|---------------------------------------------------------------------|
| oL3082 | ATCGATGAATTCGAGCTCGT<br>AGGAGTGCAAAAAGAGAAAATAAAA<br>GTAAAAAGGTAGGGCAACACATAGT<br>atcgatgaattcgagctcgt | 70 | FW | <i>gal3Δ::KanMxRV-<br/>P<sub>GAL1</sub>(P<sub>5XGAL1</sub>)-Luc</i> |
| oL3083 | TATGAGTAAACTTTTAATATTTAAA<br>GGTTGTTCCAAGAAGGTGTTTAGTG<br>TGGATCCTTGCAAATTAAG                          | 70 | RV | <i>gal3Δ::KanMxRV-<br/>P<sub>GAL1</sub>(P<sub>5XGAL1</sub>)-Luc</i> |

**Primers used for confirmation of gene deletions and genome integration.**

| Name   | Sequence (5'-3')                                       | Length (bp) |    | Description                   |
|--------|--------------------------------------------------------|-------------|----|-------------------------------|
| oL2789 | ttgtaacgatgaggaacc                                     | 20          | FW | Upstream<br><i>FLO1</i>       |
| oL2289 | CCTCTAGGTTCTTTGTTACTTCT                                | 24          | RV | Internal<br><i>URA3</i>       |
| oL2807 | tcacctgcttgaatcgttg                                    | 20          | RV | Upstream<br><i>FLO1</i>       |
| oL2288 | CCTTTTGATGTTAGCAGAATTGTC                               | 24          | FW | Internal<br><i>URA3</i>       |
| oL2099 | GAGACAGCATTGCGCCAGTA                                   | 20          | FW | Upstream<br><i>GAL4</i>       |
| oL2163 | GATTCGTCGTCGATTGTC                                     | 20          | RV | Internal<br><i>NatMx</i>      |
| 4      | AGGTTACATGGCCAAGATTGA                                  | 21          | RV | Upstream<br><i>GAL4</i>       |
| oL2164 | AGGTCACCAACGTCAACGCA                                   | 20          | FW | Internal<br><i>NatMx</i>      |
| oL2096 | TCTTCATTTACCGGCGCACT                                   | 20          | FW | Upstream<br><i>GAL80</i>      |
| oL2094 | CGGCGGGAGATGCAATAGG                                    | 19          | RV | Internal<br><i>HphMx</i>      |
| oL2097 | CGCTGCTGCAAAGTTTTGAC                                   | 20          | RV | Upstream<br><i>GAL80</i>      |
| oL2095 | TCGCCCCGAGAAGCGCGGCC                                   | 20          | FW | Internal<br><i>HphMx</i>      |
| oL3078 | CAGTCCGAGCGTTTAGAAGG                                   | 20          | FW | Upstream<br><i>FLO11</i>      |
| oL3089 | ATGAAATCGCCATGCCAAGC                                   | 20          | FW | Upstream<br><i>GAL3</i>       |
| oL2091 | CATCCTATGGAAGTGCCTCGG                                  | 21          | FW | Internal<br><i>KanMx</i>      |
| oL3127 | GTGCGGAGCCACTCTGACTC                                   | 20          | RV | Upstream<br><i>GAL3</i>       |
| oL1734 | GGCCGGCCGCTTCGAGCAGACATGA<br>TAAGAtcatgtaattagttatgtca | 50          | FW | <i>CYC1<sub>ter</sub>-Luc</i> |

**Primers used for real time PCR (qPCR).**

| Name   | Sequence (5'-3')     | Length (bp) |    | Description                         |
|--------|----------------------|-------------|----|-------------------------------------|
| oL3682 | GGGTTTTCGTTCTGTGATCT | 20          | FW | <i>HEM2</i><br><i>housekeeping</i>  |
| oL3683 | TTGAATGACTGGCCCTGCAG | 20          | RV | <i>HEM2</i><br><i>housekeeping</i>  |
| oL3692 | GGATCAGGTCTTCCGTAGCG | 20          | FW | <i>TAF10</i><br><i>housekeeping</i> |
| oL3693 | TGAAATCTGCTGCACGCCA  | 19          | RV | <i>TAF10</i><br><i>housekeeping</i> |

---

|        |                      |    |    |                |
|--------|----------------------|----|----|----------------|
| oL3321 | TGCCGTCACAGATAGATTGG | 20 | RV | <i>GAL4-BD</i> |
| oL3322 | CTCTTCCGATGATGATGTCG | 20 | FW | <i>GAL4-BD</i> |

---
